# Supplementary material
Source: publisher figshare collection journal article supplement (https://acs.figshare.com/ndownloader/files/4559095)
Supplement: Supplementary file 1 [file 4559095]

## SUPPORTING INFORMATION

**Figure S4.** List of the core structures that are performed by common chemical modifications (above), the values of the log P (middle) and the chemical modification (below).

| 1. Core structure                                                                 |                                                                                   |
|-----------------------------------------------------------------------------------|-----------------------------------------------------------------------------------|
| 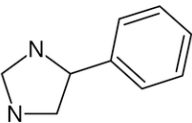 |  |
| 1.178                                                                             | 1.671                                                                             |
| Before chemical modification                                                      | After chemical modification                                                       |
| None                                                                              |  |

| 2. Core structure                                                                 |                                                                                     |
|-----------------------------------------------------------------------------------|-------------------------------------------------------------------------------------|
| 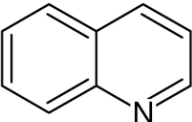 |    |
| 2.125                                                                             | 5.102                                                                               |
| Before chemical modification                                                      | After chemical modification                                                         |
| None                                                                              |  |

| 3. Core structure                                                                   |                                                                                     |
|-------------------------------------------------------------------------------------|-------------------------------------------------------------------------------------|
| 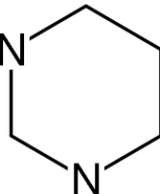 |  |
| -0.277                                                                              | 1.178                                                                               |
| Before chemical modification                                                        | After chemical modification                                                         |
|  |  |

| 4. Core structure                                                                   |                                                                                     |
|-------------------------------------------------------------------------------------|-------------------------------------------------------------------------------------|
| 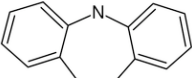 |  |
| 3.515                                                                               | 3.786                                                                               |
| Before chemical modification                                                        | After chemical modification                                                         |

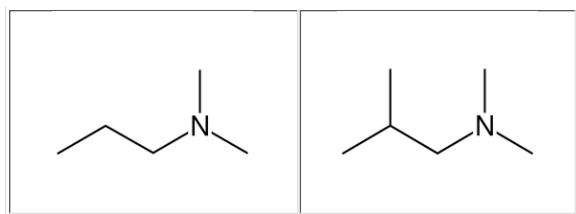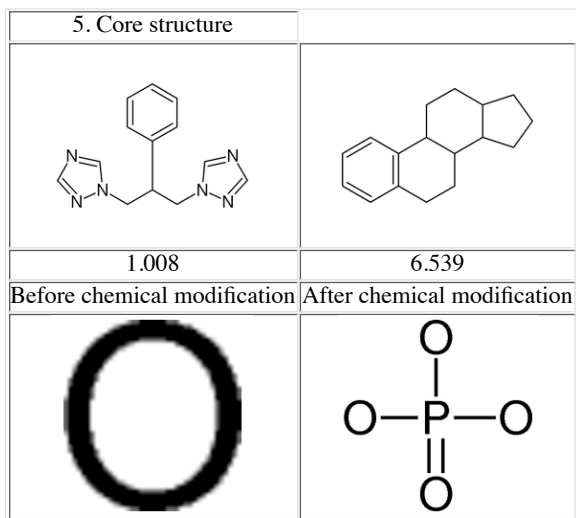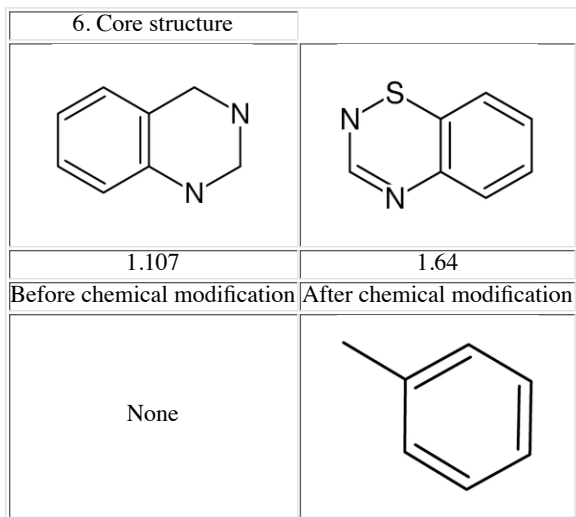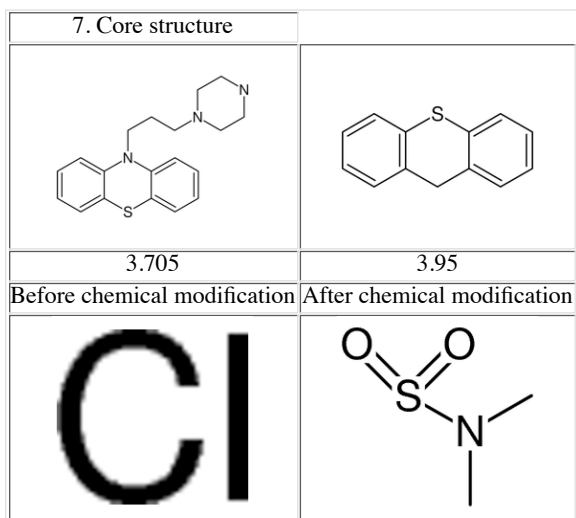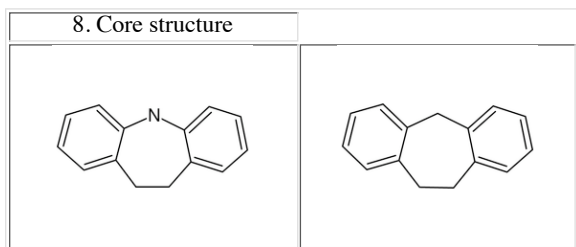

|                                                                                   |                                                                                   |
|-----------------------------------------------------------------------------------|-----------------------------------------------------------------------------------|
| 3.515                                                                             | 4.312                                                                             |
| Before chemical modification                                                      | After chemical modification                                                       |
| 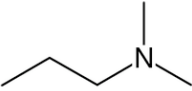 |  |

|                                                                                   |                                                                                   |
|-----------------------------------------------------------------------------------|-----------------------------------------------------------------------------------|
| 9. Core structure                                                                 |                                                                                   |
| 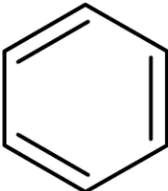 |  |
| 2.022                                                                             | 3.22                                                                              |
| Before chemical modification                                                      | After chemical modification                                                       |
| None                                                                              |  |

|                                                                                     |                                                                                     |
|-------------------------------------------------------------------------------------|-------------------------------------------------------------------------------------|
| 10. Core structure                                                                  |                                                                                     |
| 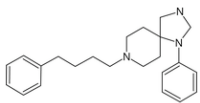  |   |
| 5.077                                                                               | 5.102                                                                               |
| Before chemical modification                                                        | After chemical modification                                                         |
|  |  |

|                                                                                     |                                                                                     |                                                                                     |
|-------------------------------------------------------------------------------------|-------------------------------------------------------------------------------------|-------------------------------------------------------------------------------------|
| 11. Core structure                                                                  |                                                                                     |                                                                                     |
| 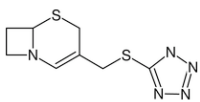 |  |  |
| 1.816                                                                               | 2.022                                                                               | 3.786                                                                               |
| Before chemical modification                                                        | After chemical modification                                                         |                                                                                     |
| None                                                                                |  |                                                                                     |

|                    |
|--------------------|
| 12. Core structure |
|--------------------|

|                                                                                   |                                                                                   |                                                                                   |
|-----------------------------------------------------------------------------------|-----------------------------------------------------------------------------------|-----------------------------------------------------------------------------------|
| 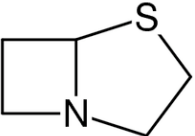 |  |  |
| 0.651                                                                             | 1.676                                                                             | 1.812                                                                             |
| Before chemical modification                                                      | After chemical modification                                                       |                                                                                   |
|  |  |                                                                                   |

| 13. Core structure                                                                 |                                                                                    |                                                                                   |                                                                                    |
|------------------------------------------------------------------------------------|------------------------------------------------------------------------------------|-----------------------------------------------------------------------------------|------------------------------------------------------------------------------------|
| 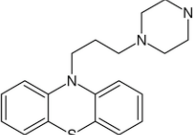  |   |  |  |
| 3.705                                                                              | 3.786                                                                              | 3.95                                                                              | 3.968                                                                              |
| Before chemical modification                                                       | After chemical modification                                                        |                                                                                   |                                                                                    |
|  |  |                                                                                   |                                                                                    |
